# Supplementary material
Source: publisher figshare collection journal article supplement (https://karger.figshare.com/articles/dataset/_/20431167)
Supplement: Supplementary file 1 [file 1]

Archive with 3 entries (3 files):
- Supplementary material-Supplementary_Material_1.pdf
- Supplementary material-Supplementary_Material_2.pdf
- Supplementary material-Supplementary_Material_3.xlsx
