# Supplementary material
Source: publisher figshare collection journal article supplement (https://karger.figshare.com/articles/dataset/_/20431167)
Supplement: Supplementary file 1 [file 1 › Supplementary material-Supplementary_Material_3.xlsx]

## Sheet: Solver
Supplementary Material 3: Excel sheet for KrGSA calculation
Input values in RED CELLS only and do not edit other cells													L∞	t	N
	Then, activatre Solver with F4 cell as Target Cell and H4 cell as Chaning Cell												284286	0	0
Time (min)	Estimated uptake acivity	L1∞	L1∞(ti, tj)	ABS(L1∞ti-L1∞tj)	Ave. diff. L1∞(ti, tj)	T half	KrGSA							1	22574.9
0	0	BLANK		Difference	1783.72	8.37747	0.0827395							2	43357.1
10	160502	285178	L1∞(10,20)	2675.57										3	62489
20	228507	282502	L1∞(10,30)	0.00651757										4	80101.7
30	261348	285178	L1∞(20,30)	2675.57										5	96315.8
														6	111242
	Liver VOI volume	Heart VOI volume	Volume ratio (L/H)											7	124984
	1460.75	744.43	0.49056											8	137634
														9	149279
Time (min)	Liver ROI acivity	Heart ROI activity	Estmated liver blood pool activity											10	160000	160502	188478
														11	169869
10	188478	57029	27976.1											12	178955
20	249370	42529	20863											13	187319
30	278510	34984	17161.7											14	195019
														15	202108
														16	208634
														17	214641
														18	220172
														19	225263
														20	229950	228507	249370
														21	234265
														22	238237
														23	241893
														24	245260
														25	248359
														26	251212
														27	253838
														28	256256
														29	258482
														30	260531	261348	278510
